# Supplementary material
Source: PubMed Central journal article supplement (PMC2078147)
Supplement: oenvmed_63_3_202__1.pdf [file oenvmed_63_3_202__1.pdf]

## Appendix A

Need for Recovery scale (NFR): 11 items, dichotomous (yes/no). Translated from Dutch into English,<sup>1</sup> with permission from the author (item 4 has to be recoded; scale score is the sum score of “yes” items). Workers with an NFR-score of 6 or more enter the “red zone”

---

|     |                                                                                                        |        |
|-----|--------------------------------------------------------------------------------------------------------|--------|
| 1.  | I find it hard to relax at the end of a working day                                                    | yes/no |
| 2.  | At the end of a working day I am really feeling worn-out                                               | yes/no |
| 3.  | My job causes me to feel rather exhausted at the end of a working day                                  | yes/no |
| 4.  | Generally speaking, I'm still feeling fresh after supper                                               | yes/no |
| 5.  | Generally speaking, I am able to relax only on a second day off                                        | yes/no |
| 6.  | I have trouble concentrating in the hours off after my working day                                     | yes/no |
| 7.  | I find it hard to show interest in other people when I just came home from work                        | yes/no |
| 8.  | In general, it takes me over an hour to feel fully recovered after work                                | yes/no |
| 9.  | When I get home, people should leave me alone for some time                                            | yes/no |
| 10. | After a working day I am often too tired to start other activities                                     | yes/no |
| 11. | During the last part of the working day I cannot optimally perform my job because of fatigue sometimes | yes/no |

---

## Reference

1. Sluiter JK, Beek AJ van der, Frings-Dresen MHW. The influence of work characteristics on the need for recovery and experienced health: a study on coach drivers. *Ergonomics* 1999;**42**:573–83.
